# Supplementary material for: A selective cascade reaction-based probe for colorimetric and ratiometric fluorescence detection of benzoyl peroxide in food and living cells
Source: Royal Society of Chemistry journal article supplement (doi:10.1039/c9tb00889f), 2019-01-01
Supplement: c9tb00889f1.pdf [file c9tb00889f1.pdf]

**Electronic Supplementary Information**

**A selective cascade reaction-based probe for colorimetric and  
ratiometric fluorescence detection of benzoyl peroxide in food  
and living cells**

Xiaoli Wu <sup>a</sup>, Lintao Zeng <sup>a,\*</sup>, Bao-Quan Chen <sup>a</sup>, Ming Zhang<sup>a,\*</sup>, João Rodrigues<sup>b,c</sup>, Ruilong Sheng<sup>b,\*</sup>,  
Guang-Ming Bao<sup>d,\*</sup>

<sup>a</sup>. *Tianjin Key Laboratory of Organic Solar Cells and Photochemical Conversion, Tianjin University of Technology, Tianjin 300384, P. R. China. E-mail: zlt1981@126.com (L. Zeng); zm2404@tjut.edu.cn (M. Zhang).*

<sup>b</sup>. *Department of Chemistry and Materials Science, Hubei Engineering University, Hubei Xiaogan 432100, P. R. China.*

<sup>c</sup>. *CQM-Centro de Química da Madeira, Universidade da Madeira, Campus da Penteada, 9000-390, Funchal, Madeira, Portugal. E-mail: ruilong.sheng@staff.uma.pt (R. Sheng)*

<sup>d</sup>. *Institute of Veterinary Drug/Jiangxi Provincial Key Laboratory for Animal Health, Jiangxi Agricultural University, Nanchang, 330045, P.R. China. E-mail: bycb2005@gmail.com (G. M. Bao).*

## Table of Contents

**Fig. S1.**  $^1\text{H}$  NMR spectrum of probe in DMSO- $d_6$  (400 MHz)

**Fig. S2.**  $^{13}\text{C}$  NMR spectrum of probe in DMSO- $d_6$  (100MHz)

**Fig. S3.**  $^1\text{H}$  NMR spectrum of compound 2 in DMSO- $d_6$  (400 MHz)

**Fig. S4.** HR-MS (ESI) spectrum of probe

**Fig. S5.** Fluorescence emission spectra of compound A (7-(diethylamino)-2H-chromen-2-one), compound B (7-(diethylamino)-2-oxo-2H-chromene-3-carbaldehyde), probe **Cou-BPO** and probe **Cou-BPO** in the presence of benzoyl peroxide(BPO).

**Fig. S6.** HR-MS (ESI) spectrum of the probe in the presence of excessive benzoyl peroxide (BPO)

**Fig. S7.**  $^1\text{H}$  NMR spectrum of **Cou-Pyr** in MeOD- $d_4$  (400 MHz)

**Fig. S8.** HR-MS (ESI) spectrum of **Cou-Pyr**

**Fig. S9.** Absorption spectra of **Cou-Pyr** (10  $\mu\text{M}$ ) after addition of benzoyl peroxide (BPO, 150  $\mu\text{M}$ ) in EtOH solution.

**Fig. S10.** Cytotoxicity of the **Cou-BPO** in living HeLa cells for 24 h

**Fig. S11.** Confocal fluorescence images of benzoyl peroxide in living HeLa cells.

**S1. Experimental procedures for cytotoxicity measurement of Cou-BPO**

**S2. Experimental procedures for fluorescence imaging of BPO in living cells**

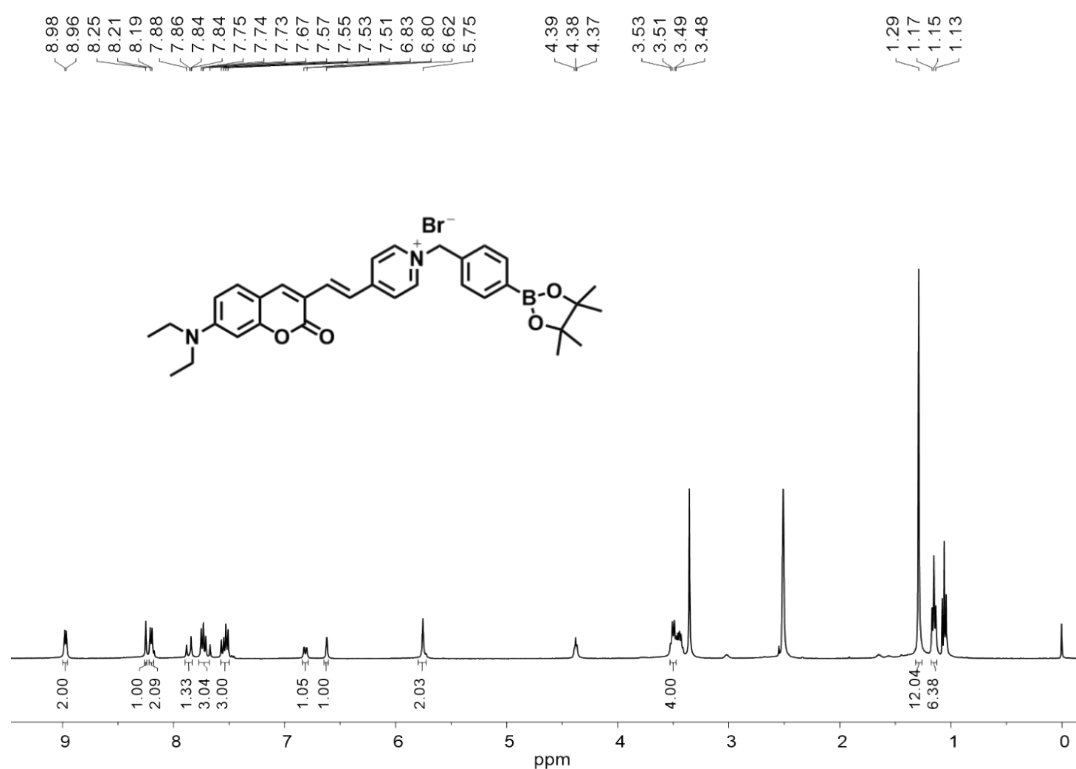

**Fig. S1.** <sup>1</sup>H NMR spectrum of probe in DMSO-d<sub>6</sub> (400 MHz)

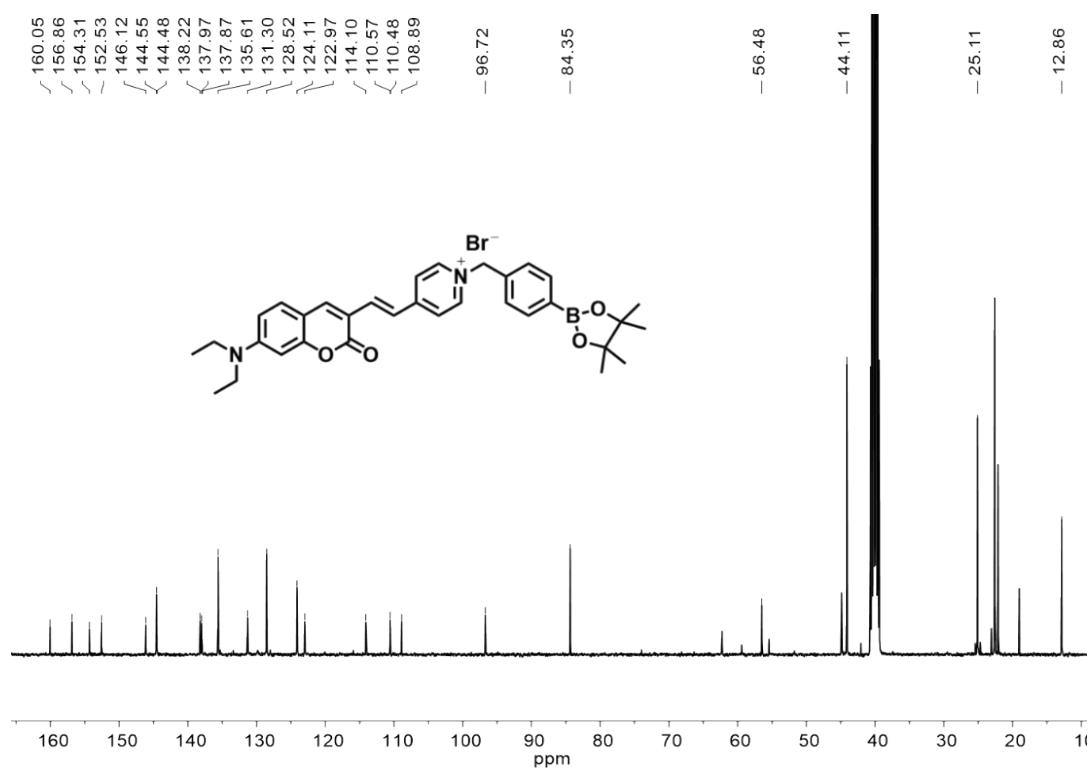

**Fig. S2.** <sup>13</sup>C NMR spectrum of probe in DMSO-d<sub>6</sub> (100 MHz)

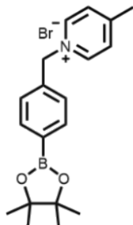

**Fig. S4.** HR-MS (ESI) spectrum of probe

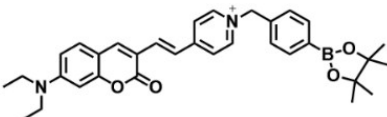

**Fig. S4.** HR-MS (ESI) spectrum of probe

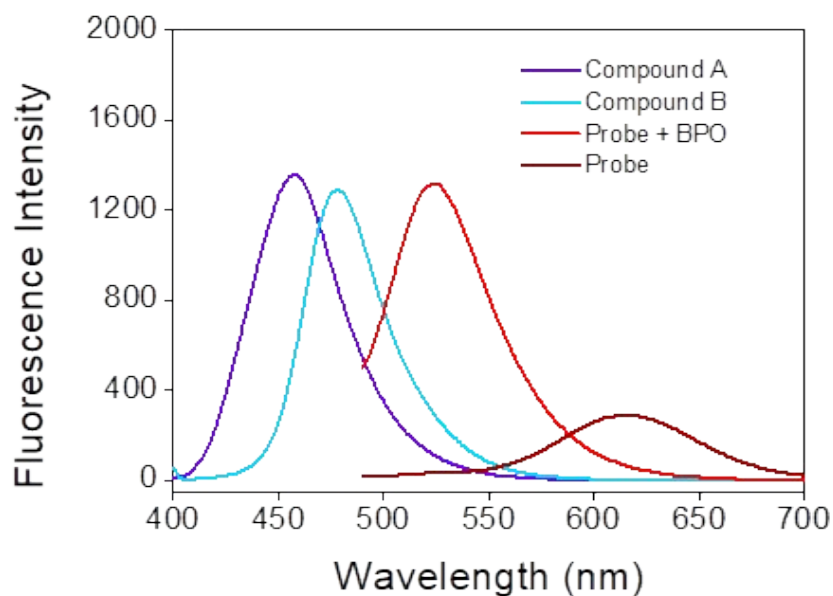

**Fig. S5.** Fluorescence emission spectra of compound A (7-(diethylamino)-2H-chromen-2-one), compound B (7-(diethylamino)-2-oxo-2H-chromene-3-carbaldehyde), probe **Cou-BPO** and probe **Cou-BPO** in the presence of benzoyl peroxide(BPO).

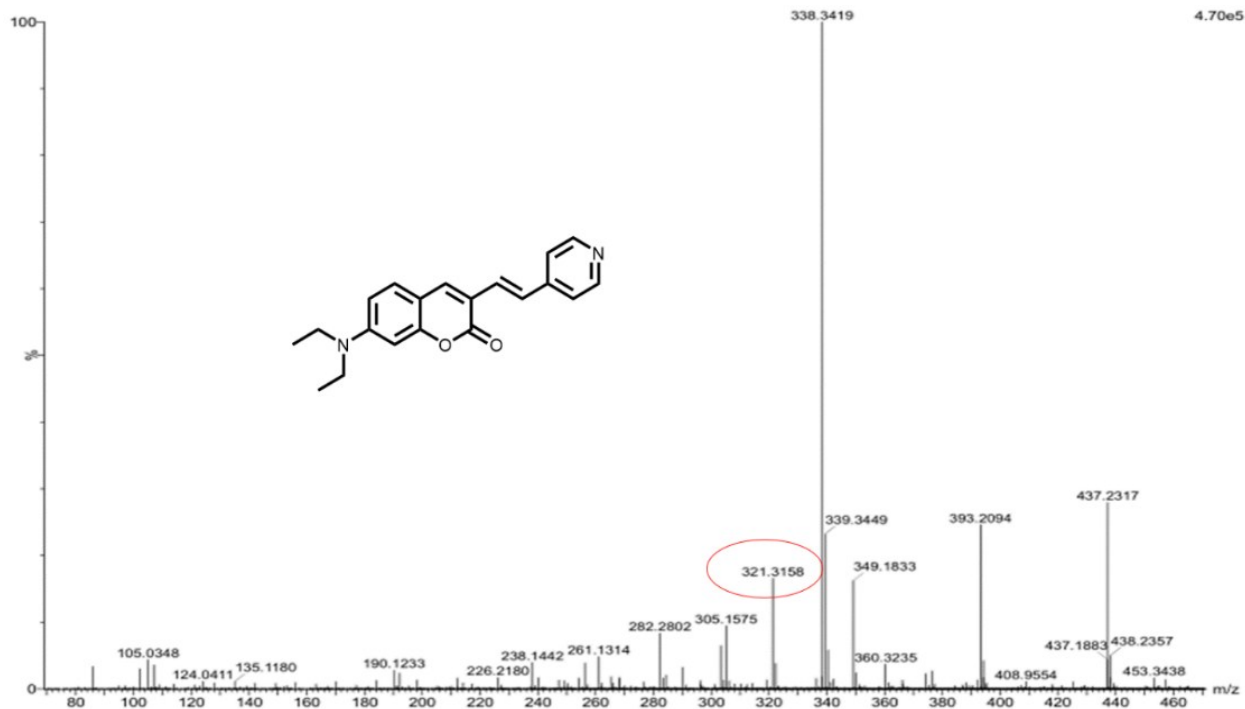

**Fig. S6.** HR-MS (ESI) spectrum of the probe in the presence of excessive benzoyl peroxide (BPO)

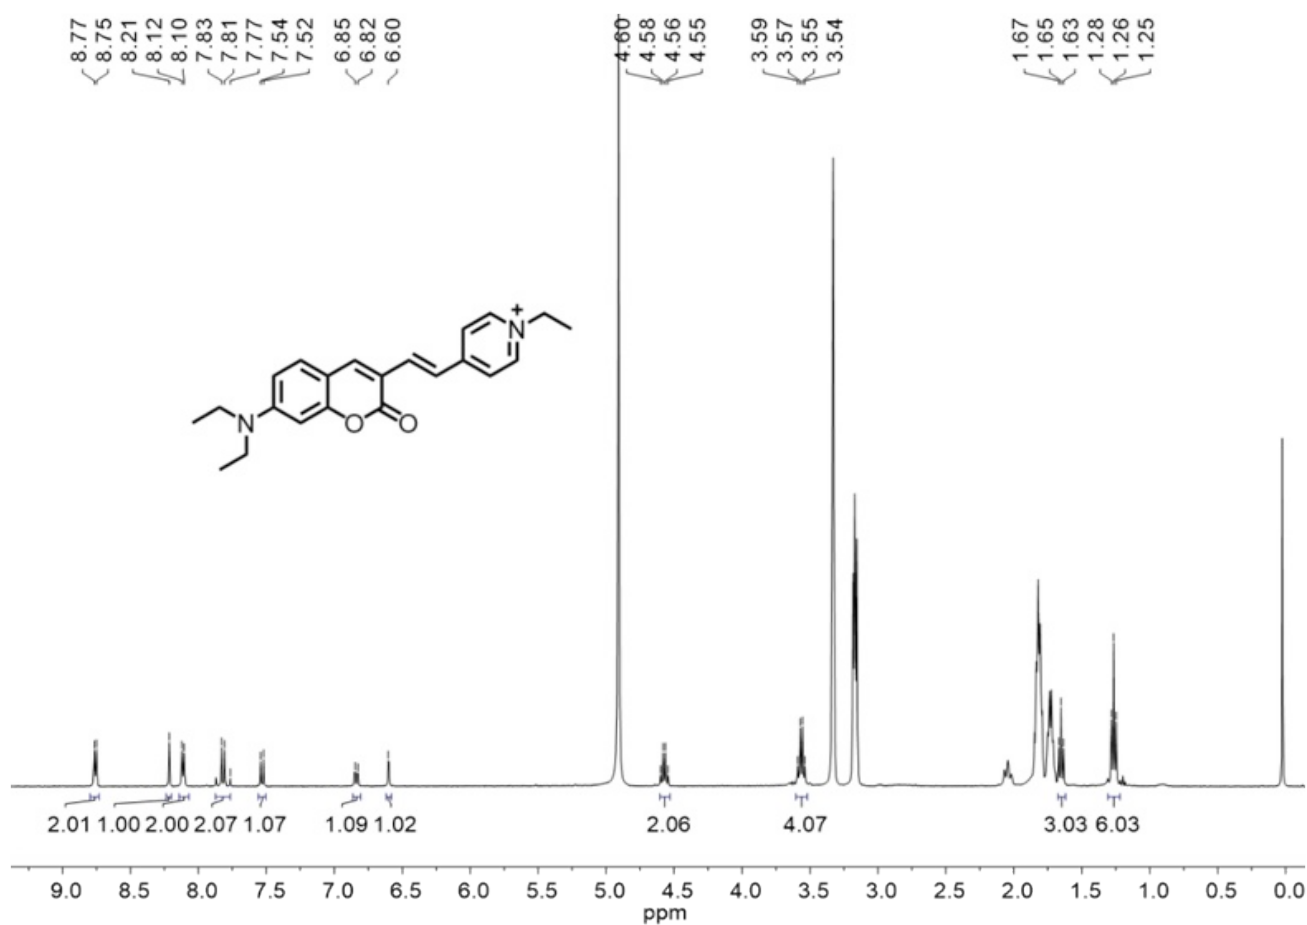

**Fig. S7.** <sup>1</sup>H NMR spectrum of **Cou-Pyr** in MeOD-d<sub>4</sub> (400 MHz)

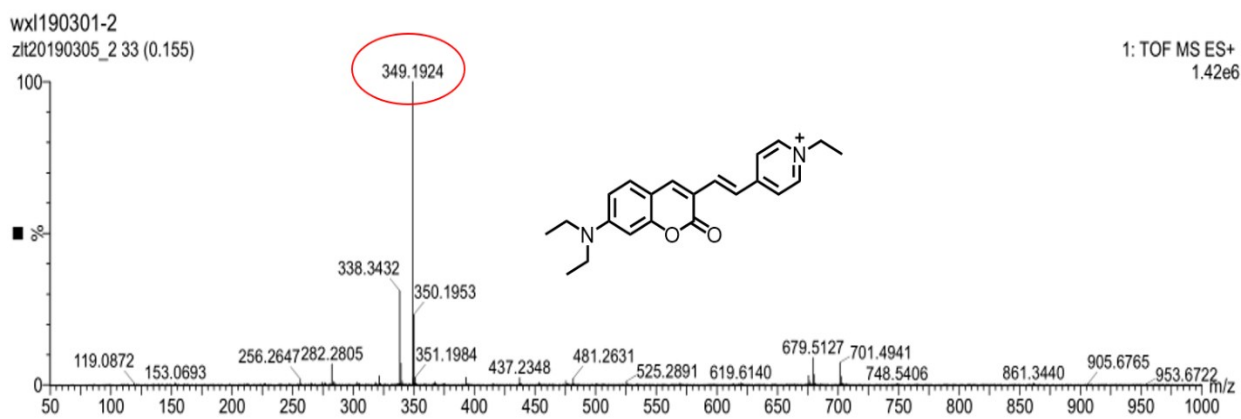

**Fig. S8.** HR-MS (ESI) spectrum of **Cou-Pyr**

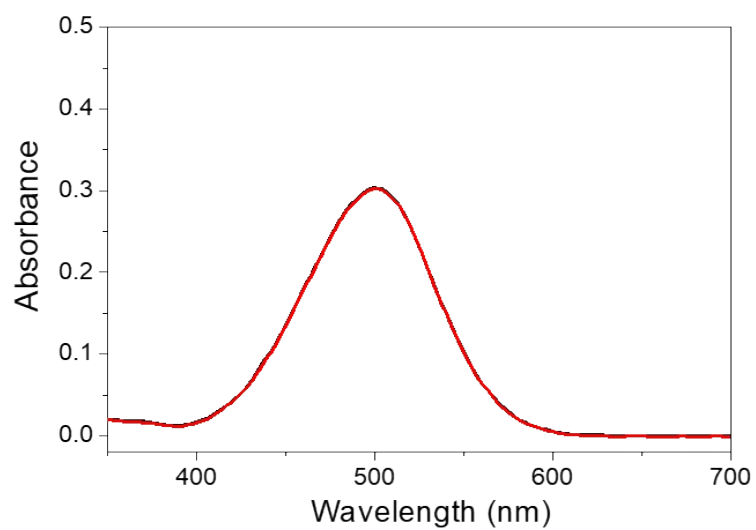

**Fig. S9.** Absorption spectra of **Cou-Pyr** (10  $\mu\text{M}$ ) after addition of benzoyl peroxide (BPO, 150  $\mu\text{M}$ ) in EtOH solution.

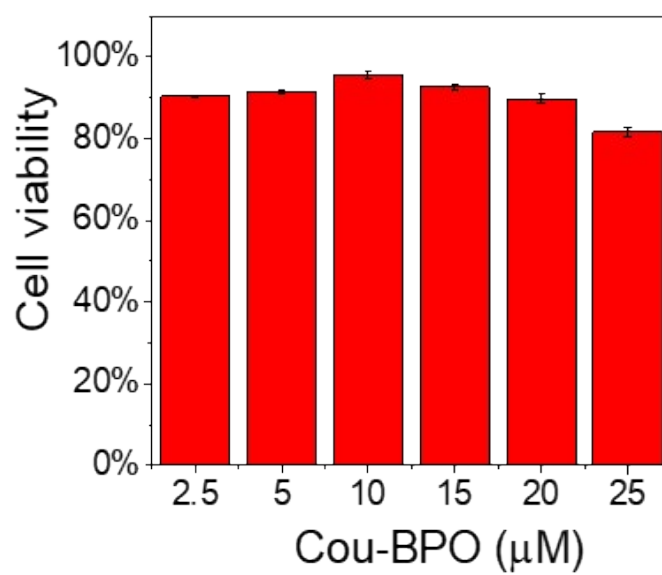

**Fig. S10.** Cytotoxicity of the **Cou-BPO** in living HeLa cells for 24 h

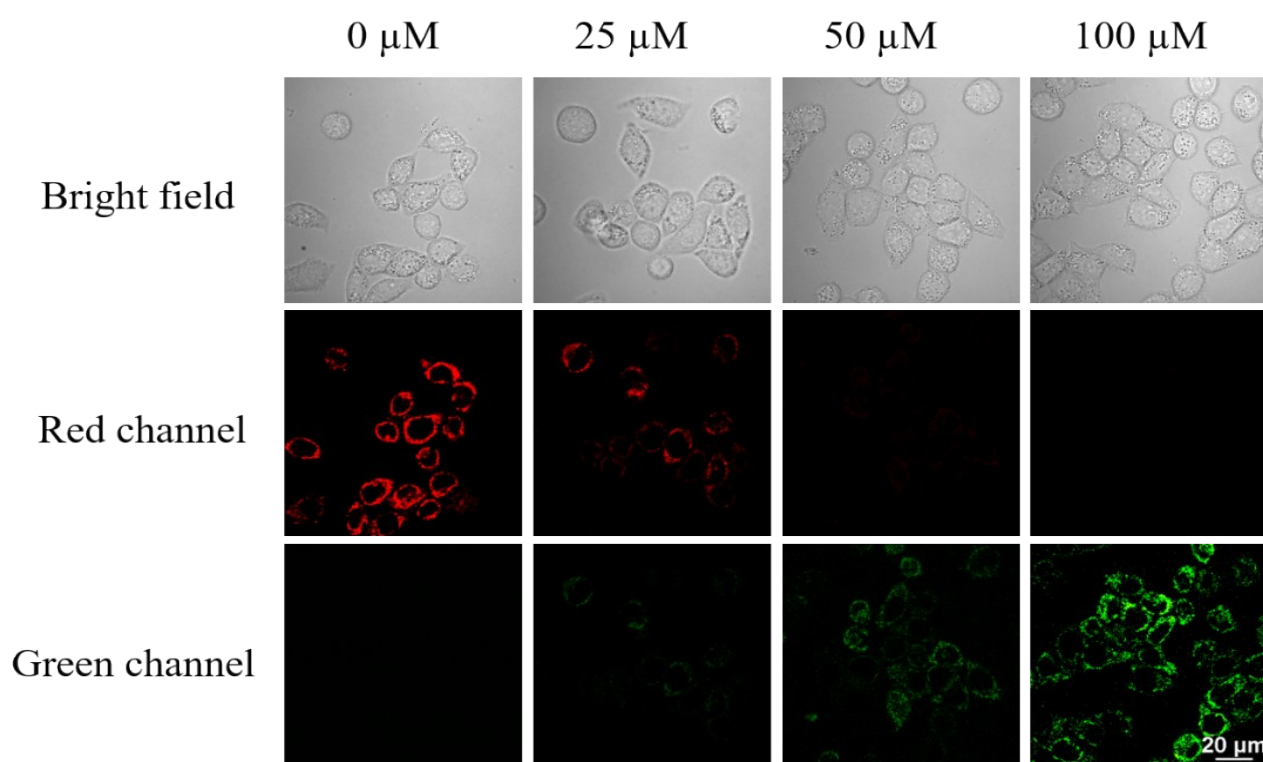

**Fig. S11.** Confocal fluorescence images of benzoyl peroxide in living HeLa cells.



## S1. Experimental procedures for cytotoxicity measurement of Cou-BPO

Cytotoxicity of **Cou-BPO** was evaluated by Cell Counting Kit-8 (CCK-8) analysis in L929 cells.  $5 \times 10^3$  cells/well were seeded in a 96-well plate (Corning) and incubated for 24 h at 37°C with 5% CO<sub>2</sub>. Cells were washed with Dulbecco's modified Eagle's medium (DMEM), and then incubated with Cou-BPO (2.5, 5, 10, 15 and 25 µM) for 24 h. Finally, they were washed three times with serum-free DMEM, then 100 µL serum-free DMEM containing 10% CCK-8 were added to each well and incubated for 1 h. The absorbance was measured at 450 nm on a plate reader. Cell viability rate was calculated according to the equation:

$$\text{Cell viability rate} = \frac{A - A_0}{A_s - A_0} \times 100\%$$

Where  $A$  is the absorbance of the experimental group,  $A_s$  is the absorbance of the control group (DMSO was used as the control), and  $A_0$  is the absorbance of the blank group (no cells).

## S2. Experimental procedures for fluorescence imaging of BPO in living cells

L929 cells (normal cell) were cultured in DMEM with 10% fetal bovine serum (FBS) and penicillin (100 units/mL)-streptomycin (100 units/mL) liquid (Invitrogen Corp., Carlsbad, CA) under 5% CO<sub>2</sub> at 37°C. The cells were seeded in uncoated 35 mm diameter glass-bottomed dishes and incubated for 24 h. Then the cells were incubated with **Cou-BPO** (10 µM) for 30 min, washed three times with 0.1 M PBS and mounted onto the microscope stage. For imaging of **BPO**, the above **Cou-BPO** treated cells were incubated with different concentrations of **Cou-BPO** (0, 25, 50, 100 µM) for 30 min and then used for confocal laser-scanning microscopy measurement. Fluorescence images were captured by a Nikon A1 confocal lasers scanning microscope.
